# Supplementary material for: Epidemiology of reported cases of leptospirosis in the EU/EEA, 2010 to 2021
Source: PubMed Central journal article supplement (PMC10986659; doi:10.2807/1560-7917.es.2024.29.7.2300266), 2024-02-15
Supplement: 23-00266_BEAUTE_Supplement.pdf [file 23-00266_BEAUTE_Supplement.pdf]

## Supplementary material

This supplementary material is hosted by *Eurosurveillance* as supporting information alongside the article Epidemiology of reported cases of leptospirosis in the EU/EEA, 2010 to 2021, on behalf of the authors, who remain responsible for the accuracy and appropriateness of the content. The same standards for ethics, copyright, attributions and permissions as for the article apply. Supplements are not edited by *Eurosurveillance* and the journal is not responsible for the maintenance of any links or email addresses provided therein.

**Table S1 - number and proportion of imported or locally acquired leptospirosis cases in 23 EU/EEA countries, 2010–2021**

| Country      | Locally acquired |              | Imported   |             | Unknown      |              | Total         |            |
|--------------|------------------|--------------|------------|-------------|--------------|--------------|---------------|------------|
|              | n                | %            | n          | %           | n            | %            | n             | %          |
| Austria      | 190              | 86.0%        | 21         | 9.5%        | 10           | 4.5%         | 221           | 100        |
| Czechia      | 84               | 29.9%        | 7          | 2.5%        | 190          | 67.6%        | 281           | 100        |
| Germany      | 652              | 51.1%        | 289        | 22.6%       | 335          | 26.3%        | 1,276         | 100        |
| Denmark      | 54               | 39.4%        | 44         | 32.1%       | 39           | 28.5%        | 137           | 100        |
| Estonia      | 47               | 92.2%        | 4          | 7.8%        | 0            | 0.0%         | 51            | 100        |
| Greece       | 236              | 84.6%        | 8          | 2.9%        | 35           | 12.5%        | 279           | 100        |
| Spain        | 200              | 90.5%        | 10         | 4.5%        | 11           | 5.0%         | 221           | 100        |
| Finland      | 0                | 0.0%         | 0          | 0.0%        | 16           | 100.0%       | 16            | 100        |
| France       | 1,300            | 21.5%        | 172        | 2.8%        | 4,586        | 75.7%        | 6,058         | 100        |
| Hungary      | 147              | 98.7%        | 2          | 1.3%        | 0            | 0.0%         | 149           | 100        |
| Ireland      | 91               | 41.2%        | 24         | 10.9%       | 106          | 48.0%        | 221           | 100        |
| Italy        | 34               | 7.7%         | 0          | 0.0%        | 406          | 92.3%        | 440           | 100        |
| Lithuania    | 63               | 70.8%        | 0          | 0.0%        | 26           | 29.2%        | 89            | 100        |
| Luxembourg   | 0                | 0.0%         | 0          | 0.0%        | 1            | 100.0%       | 1             | 100        |
| Latvia       | 43               | 97.7%        | 1          | 2.3%        | 0            | 0.0%         | 44            | 100        |
| Malta        | 17               | 68.0%        | 1          | 4.0%        | 7            | 28.0%        | 25            | 100        |
| Netherlands  | 396              | 52.0%        | 352        | 46.3%       | 13           | 1.7%         | 761           | 100        |
| Poland       | 36               | 83.7%        | 7          | 16.3%       | 0            | 0.0%         | 43            | 100        |
| Portugal     | 266              | 37.3%        | 9          | 1.3%        | 438          | 61.4%        | 713           | 100        |
| Romania      | 652              | 80.3%        | 1          | 0.1%        | 159          | 19.6%        | 812           | 100        |
| Sweden       | 4                | 9.8%         | 23         | 56.1%       | 14           | 34.1%        | 41            | 100        |
| Slovenia     | 84               | 41.2%        | 9          | 4.4%        | 111          | 54.4%        | 204           | 100        |
| Slovakia     | 53               | 54.6%        | 2          | 2.1%        | 42           | 43.3%        | 97            | 100        |
| <b>Total</b> | <b>4,649</b>     | <b>38.2%</b> | <b>986</b> | <b>8.1%</b> | <b>6,545</b> | <b>53.7%</b> | <b>12,180</b> | <b>100</b> |
